# Supplementary material
Source: PubMed Central journal article supplement (PMC5996690)
Supplement: JB.00690-17_zjb999094792s3.pdf [file JB.00690-17_zjb999094792s3.pdf]

Supplemental Figure 1

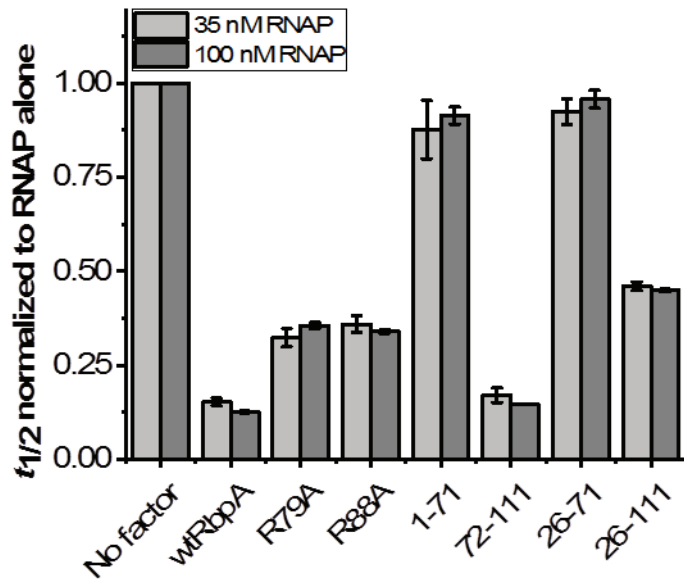

**Fig S1. RbpA effects on kinetics at multiple RNAP concentrations.**  $t_{1/2}$  values, as calculated by the time required to reach half of the final fluorescence intensity, for each sample at 35 nM and 100 nM RNAP are reported, normalized to the  $t_{1/2}$  at a given RNAP concentration. At least 3 replicates for each condition are reported, with statistical averages and errors calculated as in Fig 3B and C.

**Supplemental Table 1** DEseq2 output for gene expression in *M. smegmatis* expressing RbpA<sub>Mtb</sub><sup>R79A</sup>, RbpA<sub>Mtb</sub><sup>R88A</sup> or RbpA<sub>Mtb</sub><sup>72-111</sup> relative to *M. smegmatis* expressing RbpA<sub>Mtb</sub><sup>WT</sup>. BaseMean = the average of the normalized counts of each sample, log2FoldChange = log<sub>2</sub> fold change of the mutant (RbpA<sub>Mtb</sub><sup>R79A</sup>, RbpA<sub>Mtb</sub><sup>R88A</sup> or RbpA<sub>Mtb</sub><sup>72-111</sup>) relative to wild-type (RbpA<sub>Mtb</sub><sup>WT</sup>). lcfse = log fold change standard error, stat = Wald statistic, pvalue = unadjusted p-value, and padj = Benjamini-Hochberg adjusted p-value for multiple comparisons. Three replicates were included for each strain.

**Supplemental Table 2** DEseq2 output for differentially expressed (log<sub>2</sub> fold change < -1.0 or log<sub>2</sub> fold change > 1.0 and padj ≤ 0.05) genes in *M. smegmatis* expressing RbpA<sub>Mtb</sub><sup>R79A</sup>, RbpA<sub>Mtb</sub><sup>R88A</sup> or RbpA<sub>Mtb</sub><sup>72-111</sup> relative to *M. smegmatis* expressing RbpA<sub>Mtb</sub><sup>WT</sup>. Columns are defined as in Supplemental Table 1 with the addition of the Mycobrowser product for the 30 genes with the greatest absolute value of log<sub>2</sub> fold change.

Supplementary  
Table 3

| Primer Name               | Primer Sequence (5' - 3')                                                             |
|---------------------------|---------------------------------------------------------------------------------------|
| RbpA forward XbaI         | GTCTAGAATGGCTGATCGTGTCTGAGGG                                                          |
| 26-111 RbpA forward XbaI  | GTCTAGAATGCCGCGCCAGATCGCGC                                                            |
| 72-111 RbpA forward XbaI  | GTCTAGAATGCCGAAGAAGGTTAAGCCGCC                                                        |
| RbpA forward BamHI        | GGGATCCATGGCTGATCGTGTCTGAGGG                                                          |
| 26-111 RbpA forward BamHI | GGGATCCATGCCGCGCCAGATCGCGC                                                            |
| 72-111 RbpA forward BamHI | GGGATCCCCGAAGAAGGTTAAGCCGCC                                                           |
| RbpA reverse EcoRI        | GGAATTCGGCATCGAGGGACGCCTTTC                                                           |
| 1-71 RbpA reverse EcoRI   | GGAATTCTCACTCGGGCAGGTGCGCCCTC                                                         |
| RbpA reverse HindIII      | AAGCTTGGCATCGAGGGACGCCTTTC                                                            |
| 1-71 RbpA reverse HindIII | GATAAGCTTCGAATTCTCACTCGGGC                                                            |
| R79A RbpA forward         | GGTTAAGCCGCCCGCAGCAGTGGGA                                                             |
| R88A RbpA forward         | CATGCTGCTGGAGGCCCGTTCCATCGAAG                                                         |
| R79A RbpA reverse         | CCAGTGCCTCGCGGGCGGCTTAAC                                                              |
| R88A RbpA reverse         | CTTCGATGGAACGGGCCTCCAGCAGCATG                                                         |
| RbpA 2XFLAG reverse EcoRI | GGAATTCCTCACTTATCGTCTCATCCTTGTAAATCCATCT<br>TATCGTCTCATCCTTGTAAATCCATGCCGCGCCGACGTGAC |
| MSMEG_0281 RT forward     | GGTGCATCAACACGCCAAAGG                                                                 |
| MSMEG_0281 RT reverse     | GCGAAGTACGTTGCCTCAGAC                                                                 |
| MSMEG_1215 RT forward     | AACCTGCGGTTCTGTGAACCTCCTC                                                             |
| MSMEG_1215 RT reverse     | CGGCCGAGAAGATCTGTTTCGAC                                                               |
| MSMEG_1680 RT forward     | ACGTCCTCCACCACGATCATTC                                                                |
| MSMEG_1680 RT reverse     | CTGAACGGCTACACGACGAG                                                                  |
| MSMEG_2259 RT forward     | CACCGTCAGATCCCACATCAG                                                                 |
| MSMEG_2259 RT reverse     | GGCATCGCGAATCAGTTGCTC                                                                 |
| MSMEG_2387 RT forward     | GGAGGGCCGGATGACGATCTG                                                                 |
| MSMEG_2387 RT reverse     | GTGCGGACGACCCTTGAGGAAC                                                                |
| MSMEG_2528 RT forward     | CGCGATCCTGATCTGGATGTC                                                                 |
| MSMEG_2528 RT reverse     | ACTGAGCGCGAGCACTTTC                                                                   |
| MSMEG_2758 RT forward     | TGCCGATCTGCTTGAGGTAGG                                                                 |
| MSMEG_2758 RT reverse     | CTTCGTGTGGGACGAGGAAGAG                                                                |
| MSMEG_3297 RT forward     | GGTGCCTCACCAGGAAGAAGTTC                                                               |
| MSMEG_3297 RT reverse     | ACCTCGATCTCGAGTGGCTCTTC                                                               |
| MSMEG_3499 RT forward     | AGCTCTGGTGTATCGGCTGGAAC                                                               |
| MSMEG_3499 RT reverse     | TGGTTGAACTGCGGCTGGTAG                                                                 |
| MSMEG_3855 RT forward     | GCACGATCCACGACGACCG                                                                   |
| MSMEG_3855 RT reverse     | GACATGACCGCGACCGACG                                                                   |
| MSMEG_3966 RT forward     | GTGACGGCGACACCTCTACC                                                                  |
| MSMEG_3966 RT reverse     | ATTGCCACCCGTGGGATCGATG                                                                |
| MSMEG_4222 RT forward     | ACCGAGACCACGGGTGGAG                                                                   |
| MSMEG_4222 RT reverse     | GCCTGAAGGGCGTTCGAGTTCAT                                                               |
| MSMEG_4497 RT forward     | GGGCCTCGTCCGAGGATGATGAAC                                                              |
| MSMEG_4497 RT reverse     | ACGACATGATGGACACCGAAGTTC                                                              |
| MSMEG_5302 RT forward     | GGTGTCTCCATCTTCGCGATGAGTC                                                             |
| MSMEG_5302 RT reverse     | CGTGCTTCGTGTTTCGTGTTTCG                                                               |
| MSMEG_6466 RT forward     | TGCTGCCGTAAGGATCGTG                                                                   |
| MSMEG_6466 RT reverse     | ACCGCGACCAAGTGAAGTAAAC                                                                |
| MSMEG_6947 RT forward     | AGGAGGAGTTCCTCCACACCTTC                                                               |
| MSMEG_6947 RT reverse     | GCTGGACATCGGTGATGAGGC                                                                 |

**Supplemental Table 3** Sequences for primers used in this study.
